# Supplementary material for: CPEM: Accurate cancer type classification based on somatic alterations using an ensemble of a random forest and a deep neural network
Source: PubMed Central journal article supplement (PMC6858312; doi:10.1038/s41598-019-53034-3), 2019-11-15
Supplement: 41598_2019_53034_MOESM1_ESM.pdf [file 41598_2019_53034_MOESM1_ESM.pdf]

# CPEM: Accurate cancer type classification based on somatic alterations using an ensemble of random forests and a deep neural network

Kang-geun Lee<sup>1,†</sup>, Hyung-oh Jeong<sup>2,†</sup>, Semin Lee<sup>2,\*</sup>, and Won-Ki Jeong<sup>1,\*</sup>

<sup>1</sup>School of Electrical and Computer Engineering, UNIST, Ulsan, 44919, Republic of Korea.

<sup>2</sup>Department of Biomedical Engineering, School of Life Sciences, UNIST, Ulsan, 44919, Republic of Korea.

## Supplementary Material

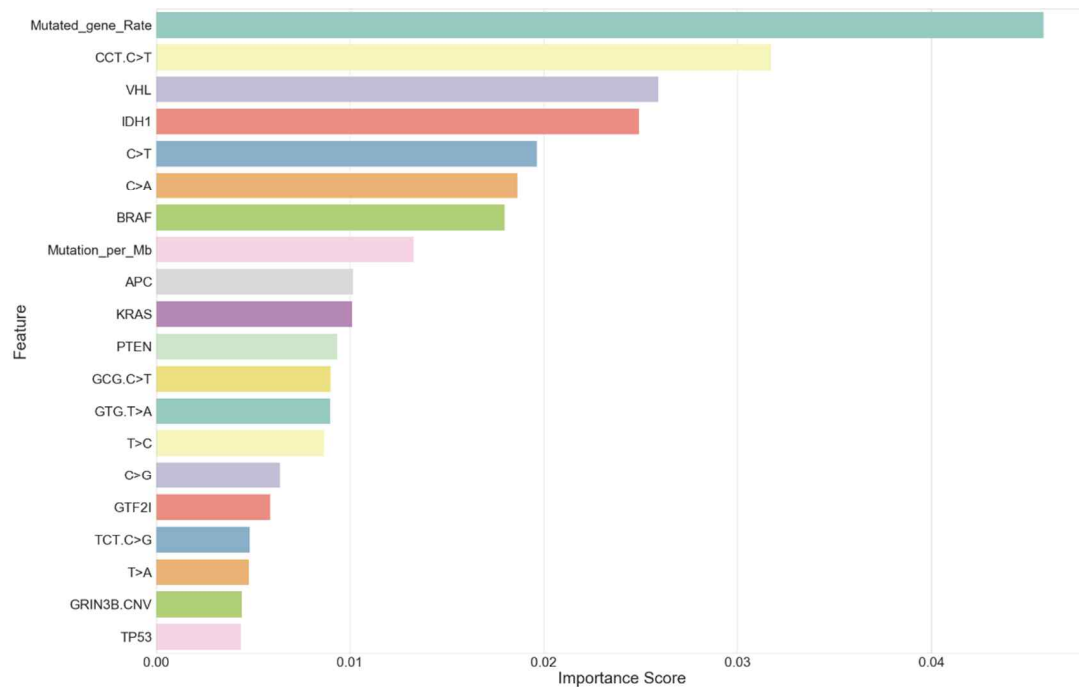

Figure S1: This figure is a bar graph that sorts as the importance for each feature in “3.2. Efficacy of Various Mutation Features”.

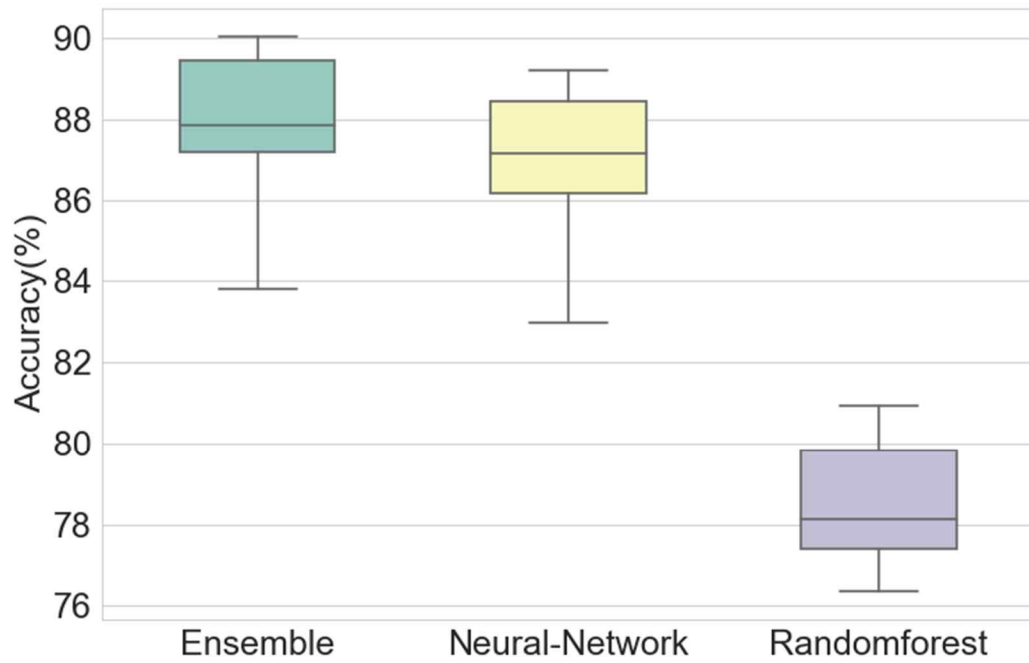

Figure S2: This boxplot is the result of Ensemble, Neural Network and Random forest with only classes with more than 200 samples.

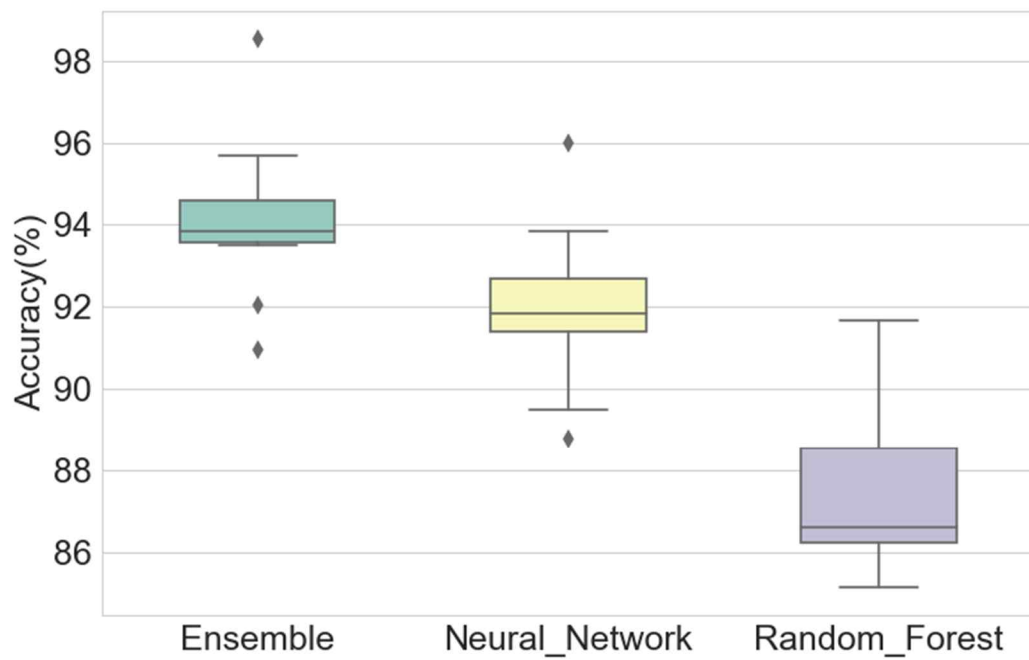

Figure S3: This boxplot is the result of Ensemble, Neural Network and Random forest with only classes with more than 300 samples

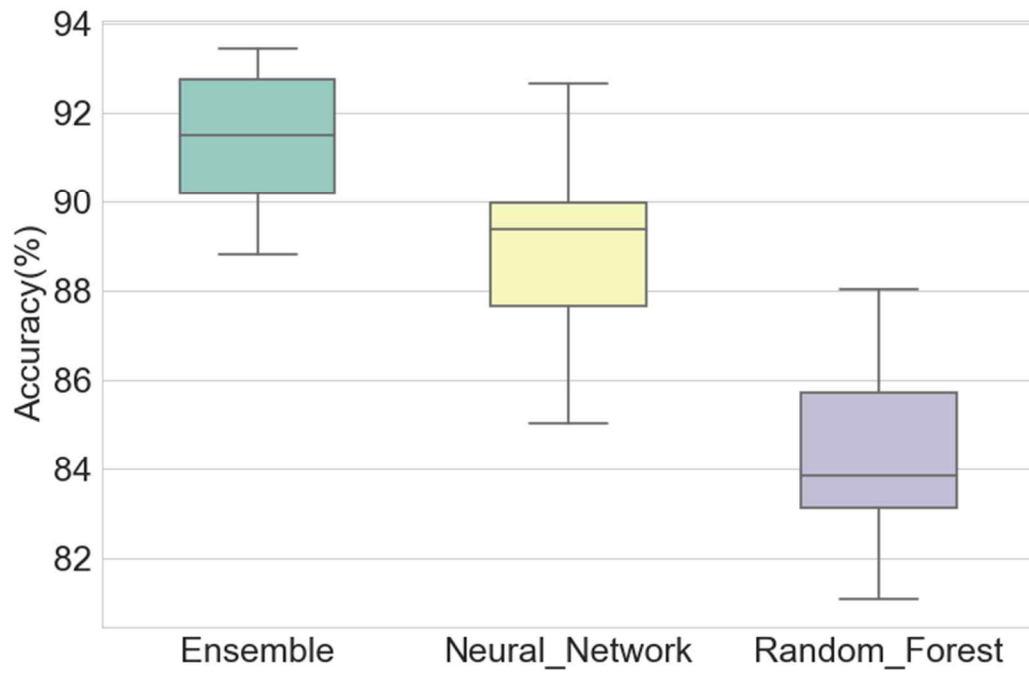

Figure S4: This boxplot is the result of Ensemble, Neural Network and Random forest with only classes the 6 cancer types used in TumorTracer .

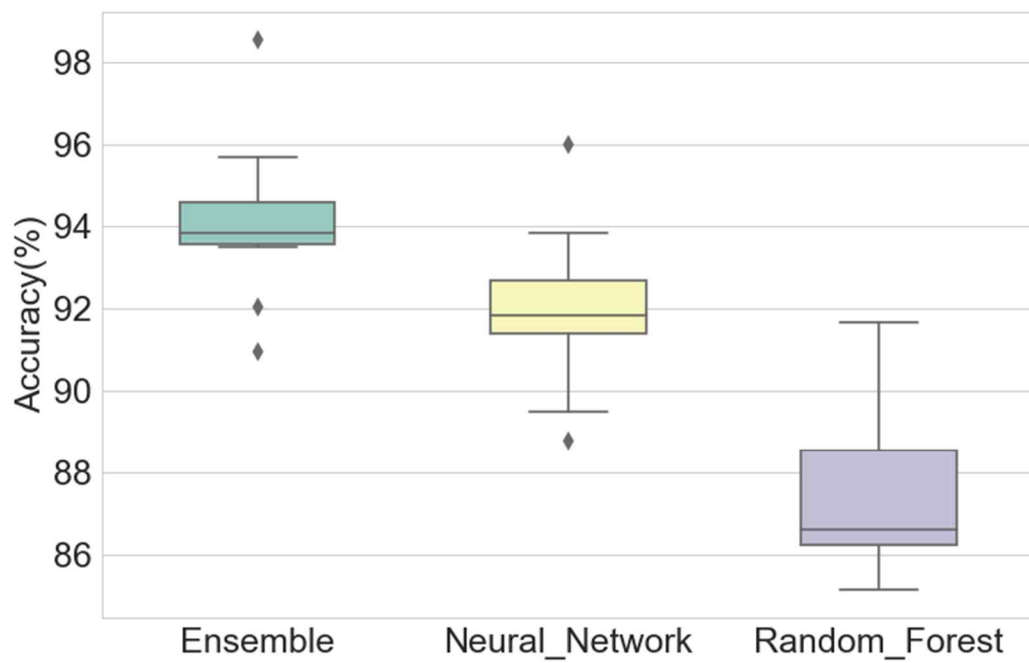

Figure S5: This boxplot is the result of Ensemble, Neural Network and Random forest with only classes the 10 cancer types used in TumorTracer .

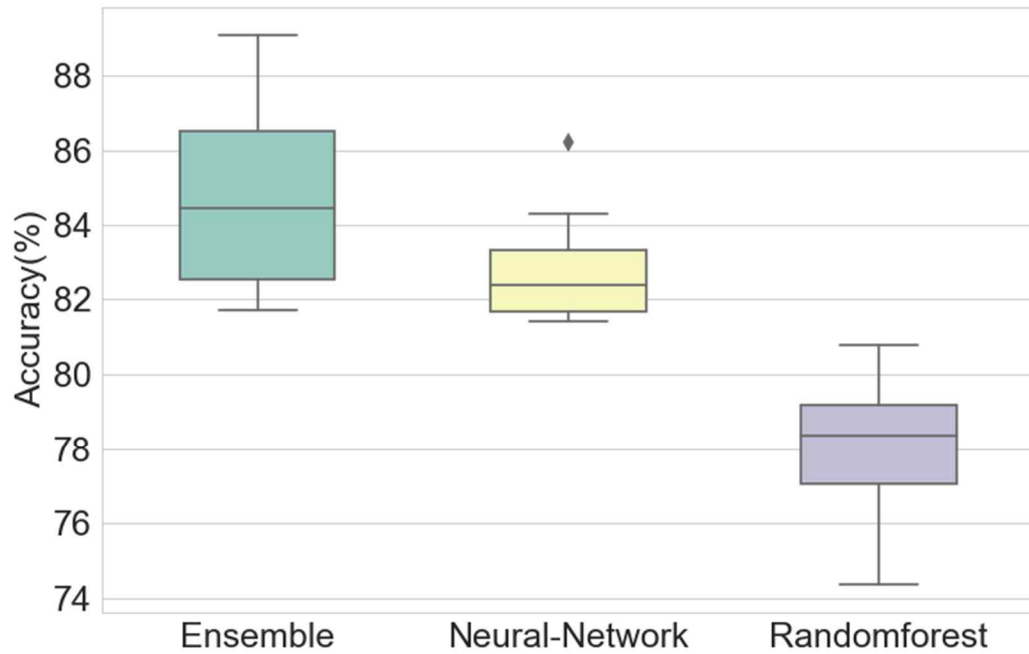

Figure S6: This boxplot is the result of Ensemble, Neural Network and Random forest with only classes the 12 cancer types used in DeepGene.

| TCGA                                  | ICGC (non-TCGA)                 |
|---------------------------------------|---------------------------------|
| <b>infiltrating carcinoma nos</b>     | <b>adenoid_cystic_carcinoma</b> |
| <b>infiltrating ductal carcinoma</b>  | <b>apocrine</b>                 |
| <b>infiltrating lobular carcinoma</b> | <b>cribriform_tubular</b>       |
| <b>medullary carcinoma</b>            | <b>ductal</b>                   |
| <b>metaplastic carcinoma</b>          | <b>lobular</b>                  |
| <b>mixed histology</b>                | <b>lobular_Pleomorphic</b>      |
| <b>mucinous carcinoma</b>             | <b>metaplastic</b>              |
| <b>other, specify</b>                 | <b>micropapillary</b>           |
|                                       | <b>mucinous</b>                 |
|                                       | <b>neuroendocrine</b>           |
|                                       | <b>no_data_supplied</b>         |
|                                       | <b>papillary</b>                |

Figure S7: Histopathological subtypes of breast cancer samples from TCGA and ICGC(non-TCGA)
